# Supplementary material
Source: publisher figshare collection journal article supplement (https://tandf.figshare.com/articles/dataset/_/12199676)
Supplement: Supplementary file 2 [file 1]

**Suppl. Table 1. Statistical analysis results comparing women without and with CIN**

|               | <b>Women<br/>negative for CIN</b> | <b>Women<br/>with CIN</b> | <b>P<br/>Value</b> |
|---------------|-----------------------------------|---------------------------|--------------------|
| <b>CD10</b>   | 0.236±0.612                       | 0.379±1.000               | 0.661              |
| <b>CD13</b>   | 13.364±26.417                     | 17.272±30.398             | 0.709              |
| <b>CD14</b>   | 3.582±10.695                      | 0.559±1.045               | 0.133              |
| <b>CD29</b>   | 12.690±21.394                     | 22.235±30.804             | 0.352              |
| <b>CD31</b>   | 1.118±2.046                       | 1.203±2.051               | 0.907              |
| <b>CD34</b>   | 0.846±1.347                       | 7.431±18.640              | 0.253              |
| <b>CD38</b>   | 1.836±2.207                       | 1.307±1.582               | 0.403              |
| <b>CD44</b>   | 23.500±27.240                     | 28.848±33.176             | 0.637              |
| <b>CD105</b>  | 2.209±4.204                       | 1.752±3.141               | 0.725              |
| <b>HLA-I</b>  | 11.755±17.487                     | 21.910±31.281             | 0.317              |
| <b>HLA-II</b> | 2.736±5.809                       | 5.086±6.875               | 0.322              |
